# Supplementary material for: Does oral exposure to cadmium and lead mediate susceptibility to colitis? The dark-and-bright sides of heavy metals in gut ecology
Source: PubMed Central journal article supplement (PMC4707487; doi:10.1038/srep19200), 2016-01-11
Supplement: srep19200-s1.pdf [file srep19200-s1.pdf]

**Does oral exposure to cadmium and lead mediate susceptibility to colitis? The dark-and-bright sides of heavy metals in gut ecology**

Jérôme Breton, Catherine Daniel, Cécile Vignal, Mathilde Body-Malapel, Anne Garat, Coline Plé, Benoît Foligné

**Table S1:** target genes and the corresponding primer accession numbers

| Gene name                           | Abbreviation        | Catalog number |
|-------------------------------------|---------------------|----------------|
| Actin beta                          | <i>Actb</i>         | Mm 01205647_g1 |
| Metallothionein 1                   | <i>Mt1</i>          | Mm 00496660_g1 |
| Metallothionein 2                   | <i>Mt2</i>          | Mm 00809556_s1 |
| Nitric oxide synthase 2 (inducible) | <i>Nos2</i>         | Mm 00440502_m1 |
| Superoxide dismutase 1              | <i>Sod1</i>         | Mm 01344233_g1 |
| Glutathione peroxidase 2            | <i>Gpx2</i>         | Mm 00850074_g1 |
| Heme oxidase 1                      | <i>Hmox1</i>        | Mm 00516004_m1 |
| Transforming growth factor, beta 1  | <i>Tgfb1</i>        | Mm 00441724_m1 |
| Cyt P450-fam.1 subfam.A, polypep 1  | <i>Cyp1a1</i>       | Mm 00487218_m1 |
| Tumor necrosis factor               | <i>Tnf</i>          | Mm 00443258_m1 |
| Interleukin 1 beta                  | <i>Il1b</i>         | Mm 01336189_m1 |
| Interleukin 6                       | <i>Il6</i>          | Mm 99999064_m1 |
| Prostaglandin synthase 2            | <i>Ptgs2 (Cox2)</i> | Mm 00478374_m1 |
| Tight junction protein 1            | <i>Zo1</i>          | Mm 00493699_m1 |
| Forkhead box O4                     | <i>FoxO4</i>        | Mm 00840140_m1 |
| Interleukin 10                      | <i>Il10</i>         | Mm 00439614_m1 |
